# Supplementary material for: Reaction of nitric oxide with the iron(III) complex of N-(dithiocarboxy)sarcosine: a new type of reductive nitrosylation involving iron(IV) as an intermediate †
Source: Royal Society of Chemistry journal article supplement (doi:10.1039/b003942j), 2000-01-01
Supplement: b003942j.doc [file b003942j.doc]

**Supporting Information** **for**

**Dalton B003942J**

_____________________________________________________________________

**Reaction of Nitric Oxide with Iron(III) Complex of**

***N*-(Dithiocarboxy)sarcosine:**

**A New Type of Reductive Nitrosylation Involving the Iron(IV) as an Intermediate**

Satoshi Fujii,*† Kazuo Kobayashi,‡ Seiichi Tagawa,‡

and Tetsuhiko Yoshimura*,†

*†Institute for Life Support Technology, Yamagata Technopolis Foundation, 2-2-1 Matsuei, Yamagata 990-2473, Japan*

*‡The Institute of Scientific and Industrial Research, Osaka University, 8-1 Mihogaoka, Ibaraki, Osaka 567-0047, Japan*

_____________________________________________________________________

Pages

Fig. S1 Chromatogram monitored by LC-ESI MS. S2

Figs. S2-S3 LC-ESI mass spectra and simulated spectra S3

Fig. S4 Free DTCS dependence of absorption changes of

Intermeditate II S5

**Fig. S1.** Chromatograms of the reaction mixture of NO and [FeIII(DTCS)3]3– monitored by ESI mass in negative mode. Profiles of (*a*) total ion, (*b*) ion of mass range 567-569, (*c*) ion of mass range 623-625, and (*d*) ion of mass range 653-655. LC conditions are described in the legend of Fig. 2.

**Fig. S2.** LC-ESI MS (negative mode) of the components eluted at 8.2 min (8:12 in Fig. S1) of the reaction mixture of excess NO and [FeIII(DTCS)3]3– ([Fe] = 1.0  10–2 mol dm–3). Experimental spectrum corresponds to the component of (*a*) Fig. S1(*c*), and (*b*) Fig. S1(*d*). Simulated spectrum (*c*) of {[NO-FeII(DTCS)2](*n*-Bu)4N}–.

**Fig. S3.** LC-ESI MS (negative mode) of the component eluted at 5.5 min (5:31 in Fig. S1) of the reaction mixture of NO and [FeIII(DTCS)3]3– (*a*). Simulated spectrum (*b*) of an anion of DTCS-disulfide with (*n*-Bu)4N+.

**Fig. S4** Absorption changes after pulse radiolysis of [FeIII(DTCS)3]3– in the presence of NaNO2 at pH 7.4 measured at 460 nm. (*a*) [{FeIII(DTCS)3}3–] = 2.5  10–4 mol dm–3, [NaNO2] = 1.0  10–2 mol dm–3. (*b*) Additional DTCS ligand (5.0  10–5 mol dm–3) was added.
